# Supplementary material for: Gene expression profiling in whole blood of patients with coronary artery disease
Source: Oxford University Press journal article supplement (doi:10.1042/cs20100043), 2010-06-09
Supplement: cs1190335add.pdf [file cs1190335add.pdf]

## ■ SUPPLEMENTARY ONLINE DATA

# Gene expression profiling in whole blood of patients with coronary artery disease

Chiara TAURINO<sup>1</sup>, William H. MILLER<sup>1</sup>, Martin W. McBRIDE\*, John D. McCLURE\*, Raya KHANIN†, María U. MORENO\*, Jane A. DYMOTT\*, Christian DELLES\* and Anna F. DOMINICZAK\*

\*BHF Glasgow Cardiovascular Research Centre, Faculty of Medicine, University of Glasgow, Glasgow G12 8TA, U.K., and †Department of Computer Science, University of Glasgow, Glasgow G12 8QQ, U.K.

**Table S1 Clinical characteristics of patients with CAD and healthy controls**

ACEI, angiotensin-converting enzyme inhibitor; ARB, angiotensin receptor blocker; BMI, body mass index; DBP, diastolic blood pressure; LDL, low-density lipoprotein; HDL, high-density lipoprotein; SBP, systolic blood pressure.

| Characteristic               | Patients with CAD (n = 12) | Healthy controls (n = 12) | P value |
|------------------------------|----------------------------|---------------------------|---------|
| Age (years)                  | 66 ± 11                    | 59 ± 7                    | NS      |
| Male gender (n)              | 12                         | 12                        |         |
| SBP (mmHg)                   | 130 ± 23                   | 135 ± 22                  | NS      |
| DBP (mmHg)                   | 78 ± 13                    | 85 ± 12                   | NS      |
| Heart rate (beats/min)       | 58 ± 5                     | 71 ± 15                   | < 0.05  |
| BMI (kg/m <sup>2</sup> )     | 26 ± 3                     | 27 ± 3                    | NS      |
| Waist/hip ratio              | 0.90 ± 0.04                | 0.90 ± 0.10               | NS      |
| Active smoker (n)            | 0                          | 0                         |         |
| Type 2 diabetes mellitus (n) | 0                          | 0                         |         |
| Hypertension (n)             | 9 (75%)                    | 0                         |         |
| Total cholesterol (mmol/l)   | 3.8 ± 0.6                  | 5.1 ± 0.5                 | < 0.05  |
| LDL-cholesterol (mmol/l)     | 1.9 ± 0.7                  | 3.4 ± 0.5                 | < 0.05  |
| HDL-cholesterol (mmol/l)     | 1.1 ± 0.3                  | 1.2 ± 0.2                 | NS      |
| CRP (mg/l)                   | 7.6 ± 11.0                 | 1.5 ± 0.9                 | NS      |
| Medication (n)               |                            |                           |         |
| Antiplatelet                 | 11                         | 2                         | < 0.001 |
| β-Blocker                    | 12                         | 0                         | < 0.001 |
| Statin                       | 11                         | 0                         | < 0.001 |
| ACEI or ARB                  | 4                          | 0                         | 0.093   |
| Calcium channel blocker      | 3                          | 0                         | NS      |

**Table S2 Clinical characteristics of patients with CAD before and after taking part in the cardiac rehabilitation programme**

Medication was not changed after compared with before participation in the rehabilitation programme. ACEI, angiotensin-converting enzyme inhibitor; ARB, angiotensin receptor blocker; BMI, body mass index; DBP, diastolic blood pressure; LDL, low-density lipoprotein; HDL, high-density lipoprotein; SBP, systolic blood pressure.

| Characteristic             | Before (n = 10) | After (n = 10) | P value |
|----------------------------|-----------------|----------------|---------|
| Age (years)                | 69 ± 9          |                |         |
| Male gender                | 10              |                |         |
| SBP (mmHg)                 | 135 ± 20        | 135 ± 23       | NS      |
| DBP (mmHg)                 | 77 ± 8          | 76 ± 9         | NS      |
| Heart rate (beats/min)     | 71 ± 11         | 67 ± 12        | NS      |
| BMI (kg/m <sup>2</sup> )   | 27.4 ± 2.4      | 28.0 ± 2.6     | NS      |
| Waist/hip ratio            | 0.96 ± 0.03     | 0.96 ± 0.04    | NS      |
| Active smoker              | 0               | 0              |         |
| Type 2 diabetes mellitus   | 0               | 0              |         |
| Hypertension (n)           | 8 (80%)         | 8 (80%)        |         |
| Total cholesterol (mmol/l) | 4.0 ± 0.7       | 4.0 ± 0.7      | NS      |
| LDL-cholesterol (mmol/l)   | 2.2 ± 0.7       | 2.1 ± 0.8      | NS      |
| HDL-cholesterol (mmol/l)   | 1.2 ± 0.2       | 1.4 ± 0.3      | 0.052   |
| CRP (mg/l)                 | 9.2 ± 13.4      | 4.6 ± 7.4      | 0.058   |
| Medication (n)             |                 |                |         |
| Antiplatelet               | 12              |                |         |
| β-Blocker                  | 7               |                |         |
| Statin                     | 8               |                |         |
| ACEI or ARB                | 4               |                |         |
| Calcium channel blocker    | 0               |                |         |

<sup>1</sup> These authors contributed equally to this work.

Correspondence: Dr Christian Delles (c.delles@clinmed.gla.ac.uk).

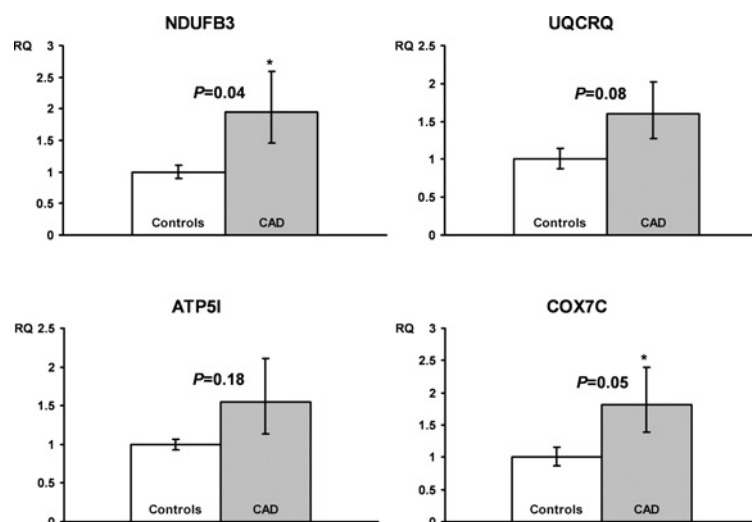

**Figure S1** TaqMan® qRT-PCR analysis of expression of candidate genes in healthy controls and patients with CAD

\* $P < 0.05$  compared with control ( $n = 12$  per group).

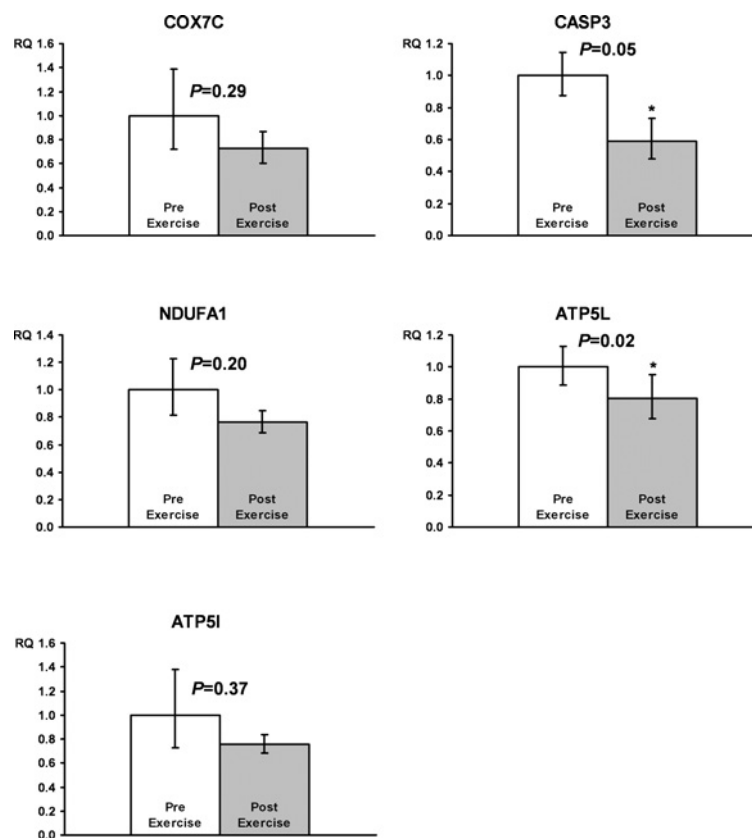

**Figure S2** TaqMan® qRT-PCR analysis of expression of candidate genes in patients with CAD before and after an exercise rehabilitation programme

\* $P < 0.05$  compared with pre-exercise ( $n = 10$  per group).

**Table S3** TaqMan<sup>®</sup> probes for qRT-PCR confirmation of gene expression profiling data

| Gene          | TaqMan <sup>®</sup> probe |
|---------------|---------------------------|
| <i>COX7C</i>  | Hs01595220_g1             |
| <i>UQCRCQ</i> | Hs00429571_g1             |
| <i>NDUFB3</i> | Hs00427185_m1             |
| <i>NDUFA1</i> | Hs00244980_m1             |
| <i>ATPSL</i>  | Hs00758883_s1             |
| <i>CASP3</i>  | Hs00234387_m1             |
| <i>ATPS1</i>  | Hs00273015_m1             |
| <i>GAPDH</i>  | Hs99999905_m1             |

**Table S4 Differentially expressed genes (microarray data) between patients with CAD and healthy control subjects (a and c), and in patients with CAD pre- and post-cardiac rehabilitation (b and d), assigned to oxidative phosphorylation (a and b) and mitochondrial dysfunction (c and d) pathways**

(a) Oxidative phosphorylation: patients with CAD compared with healthy controls

| Gene symbol                     | Entrez Gene name                                                                           | Illumina     | FDR ( <i>q</i> value) | Fold change | Entrez Gene ID |
|---------------------------------|--------------------------------------------------------------------------------------------|--------------|-----------------------|-------------|----------------|
| <i>ATP5C1</i>                   | ATP synthase, H <sup>+</sup> transporting, mitochondrial F1 complex $\gamma$ polypeptide 1 | ILMN_1701269 | 0.049                 | 1.232       | 509            |
| <i>ATP5I</i>                    | ATP synthase, H <sup>+</sup> transporting, mitochondrial F0 complex, subunit E             | ILMN_1726603 | 0.011                 | 1.356       | 521            |
| <i>COX7B</i>                    | Cytochrome <i>c</i> oxidase subunit VIIb                                                   | ILMN_2184049 | 0.005                 | 1.346       | 1349           |
| <i>COX7C</i> (includes EG:1350) | Cytochrome <i>c</i> oxidase subunit VIIc                                                   | ILMN_1798189 | 0.02                  | 1.266       | 1350           |
| <i>NDUFA4</i>                   | NADH dehydrogenase (ubiquinone) I $\alpha$ subcomplex 4, 9 kDa                             | ILMN_1751258 | 0.007                 | 1.362       | 4697           |
| <i>NDUFB3</i>                   | NADH dehydrogenase (ubiquinone) I $\beta$ subcomplex 3, 12 kDa                             | ILMN_2119945 | 0.002                 | 1.441       | 4709           |
| <i>UQCRCQ</i>                   | Ubiquinol-cytochrome <i>c</i> reductase, complex III subunit VII, 9.5 kDa                  | ILMN_1666471 | 0                     | 1.484       | 27089          |

(b) Oxidative phosphorylation: pre- compared with post-rehabilitation in patients with CAD

| Symbol                          | Entrez Gene name                                                                   | Illumina     | FDR ( <i>q</i> value) | Fold change | Entrez Gene ID |
|---------------------------------|------------------------------------------------------------------------------------|--------------|-----------------------|-------------|----------------|
| <i>ATP5I</i>                    | ATP synthase, H <sup>+</sup> transporting, mitochondrial F0 complex, subunit E     | ILMN_1772506 | 0.007                 | -1.298      | 521            |
| <i>ATP5J</i>                    | ATP synthase, H <sup>+</sup> transporting, mitochondrial F0 complex, subunit F6    | ILMN_1772929 | 0.009                 | -1.31       | 522            |
| <i>ATP5L</i>                    | ATP synthase, H <sup>+</sup> transporting, mitochondrial F0 complex, subunit G     | ILMN_1812638 | 0                     | -1.483      | 10632          |
| <i>ATP5O</i>                    | ATP synthase, H <sup>+</sup> transporting, mitochondrial F1 complex, O subunit     | ILMN_1791332 | 0.028                 | -1.205      | 539            |
| <i>ATP6VID</i>                  | ATPase, H <sup>+</sup> transporting, lysosomal 34 kDa, VI subunit D                | ILMN_1797310 | 0.006                 | -1.28       | 51382          |
| <i>COX7C</i> (includes EG:1350) | cytochrome <i>c</i> oxidase subunit VIIc                                           | ILMN_1798189 | 0                     | -1.585      | 1350           |
| <i>IHPK2</i>                    | Inositol hexakisphosphate kinase 2                                                 | ILMN_1683328 | 0.033                 | -1.186      | 51447          |
| <i>NDUFA1</i>                   | NADH dehydrogenase (ubiquinone) I $\alpha$ subcomplex 1, 7.5 kDa                   | ILMN_1784286 | 0.005                 | -1.315      | 4694           |
| <i>NDUFB2</i>                   | NADH dehydrogenase (ubiquinone) I $\beta$ subcomplex 2, 8 kDa                      | ILMN_2117330 | 0.046                 | -1.198      | 4708           |
| <i>NDUFB3</i>                   | NADH dehydrogenase (ubiquinone) I $\beta$ subcomplex 3, 12 kDa                     | ILMN_2119945 | 0.002                 | -1.315      | 4709           |
| <i>NDUFB6</i>                   | NADH dehydrogenase (ubiquinone) I $\beta$ subcomplex 6, 17 kDa                     | ILMN_1763147 | 0.03                  | -1.207      | 4712           |
| <i>NDUFS5</i>                   | NADH dehydrogenase (ubiquinone) Fe-S protein 5, 15 kDa (NADH-coenzyme Q reductase) | ILMN_1776104 | 0.005                 | -1.332      | 4725           |

**Table S4 Continued**

(c) Mitochondrial dysfunction: patients with CAD compared with healthy controls

| Symbol                          | Entrez Gene name                                                                         | Illumina     | FDR (q value) | Fold change | Entrez Gene ID |
|---------------------------------|------------------------------------------------------------------------------------------|--------------|---------------|-------------|----------------|
| <i>ATP5C1</i>                   | ATP synthase, H <sup>+</sup> transporting, mitochondrial F1 complex, gamma polypeptide 1 | ILMN_1701269 | 0.049         | 1.232       | 509            |
| <i>COX7B</i>                    | Cytochrome c oxidase subunit VIIb                                                        | ILMN_2184049 | 0.005         | 1.346       | 1349           |
| <i>COX7C</i> (includes EG:1350) | Cytochrome c oxidase subunit VIIc                                                        | ILMN_1798189 | 0.02          | 1.266       | 1350           |
| <i>NDUFA4</i>                   | NADH dehydrogenase (ubiquinone) 1 $\alpha$ subcomplex, 4, 9 kDa                          | ILMN_1751258 | 0.007         | 1.362       | 4697           |
| <i>NDUFB3</i>                   | NADH dehydrogenase (ubiquinone) 1 $\beta$ subcomplex, 3, 12 kDa                          | ILMN_2119945 | 0.002         | 1.441       | 4709           |

(d) Mitochondrial dysfunction: pre- compared with post-rehabilitation in patients with CAD

| Symbol                           | Entrez Gene name                                                                   | Illumina     | FDR (q-value) | Fold change | Entrez Gene ID |
|----------------------------------|------------------------------------------------------------------------------------|--------------|---------------|-------------|----------------|
| <i>APH1A</i> (includes EG:51107) | Anterior pharynx defective 1 homologue A ( <i>Caenorhabditis elegans</i> )         | ILMN_2398388 | 0.026         | 1.22        | 51107          |
| <i>ATP5J</i>                     | ATP synthase, H <sup>+</sup> transporting, mitochondrial FO complex, subunit F6    | ILMN_1772929 | 0.009         | -1.31       | 522            |
| <i>CASP3</i>                     | Caspase 3, apoptosis-related cysteine peptidase                                    | ILMN_2388155 | 0.006         | -1.265      | 836            |
| <i>CASP8</i>                     | Caspase 8, apoptosis-related cysteine peptidase                                    | ILMN_1673757 | 0.001         | -1.449      | 841            |
| <i>CAT</i>                       | Catalase                                                                           | ILMN_1651705 | 0.041         | -1.302      | 847            |
| <i>COX7C</i> (includes EG:1350)  | Cytochrome c oxidase subunit VIIc                                                  | ILMN_1798189 | 0             | -1.585      | 1350           |
| <i>NDUFB2</i>                    | NADH dehydrogenase (ubiquinone) 1 $\beta$ subcomplex 2, 8 kDa                      | ILMN_2117330 | 0.046         | -1.198      | 4708           |
| <i>NDUFB3</i>                    | NADH dehydrogenase (ubiquinone) 1 $\beta$ subcomplex 3, 12 kDa                     | ILMN_2119945 | 0.002         | -1.315      | 4709           |
| <i>NDUFB6</i>                    | NADH dehydrogenase (ubiquinone) 1 $\beta$ subcomplex 6, 17 kDa                     | ILMN_1763147 | 0.03          | -1.207      | 4712           |
| <i>NDUFS5</i>                    | NADH dehydrogenase (ubiquinone) Fe-S protein 5, 15 kDa (NADH-coenzyme Q reductase) | ILMN_1776104 | 0.005         | -1.332      | 4725           |

Received 19 January 2010/25 May 2010; accepted 7 June 2010  
 Published as Immediate Publication 7 June 2010, doi:10.1042/CS20100043
